# Supplementary material
Source: PubMed Central journal article supplement (PMC7848983)
Supplement: AAC.01909-20-s0001.pdf [file AAC.01909-20-s0001.pdf]

**TABLE S1** Summary of univariable and multivariable population PK model building process

| Univariable analysis for each parameter | Type of variables | Population model                                                          |                                                                                                                                                  | OFV     | $\Delta$ OFV |
|-----------------------------------------|-------------------|---------------------------------------------------------------------------|--------------------------------------------------------------------------------------------------------------------------------------------------|---------|--------------|
|                                         |                   | Vc                                                                        | CL                                                                                                                                               |         |              |
| <b>Base model (BW on Vc and CL)</b>     |                   | $V_c = \theta_v \times (BW)^{1.0}$                                        | $CL = \theta_{CL} \times (BW)^{1.0}$                                                                                                             | 1608.55 | -            |
| eGFR on CL                              | Continuous        | $V_c = \theta_v \times (BW)^{1.0}$                                        | $CL = \theta_{CL} \times (BW)^{1.0} \times (eGFR/38.2)^{\theta_{CL-eGFR}}$                                                                       | 1533.21 | -75.34       |
| SIRS score on CL                        | Categorical       | $V_c = \theta_v \times (BW)^{1.0}$                                        | $CL = \theta_{CL} \times (BW)^{1.0} \times (1 + \theta_{CL-SIRS})^{SIRS}$                                                                        | 1555.02 | -53.53       |
| Daily urine excretion on CL             | Continuous        | $V_c = \theta_v \times (BW)^{1.0}$                                        | $CL = \theta_{CL} \times (BW)^{1.0} \times (UE/480)^{\theta_{CL-UE}}$                                                                            | 1610.21 | +1.66        |
| Daily ascites excretion on CL           | Continuous        | $V_c = \theta_v \times (BW)^{1.0}$                                        | $CL = \theta_{CL} \times (BW)^{1.0} \times (AE/105)^{\theta_{CL-AE}}$                                                                            | 1608.45 | -0.10        |
| CRRT on CL                              | Categorical       | $V_c = \theta_v \times (BW)^{1.0}$                                        | $CL = \theta_{CL} \times (BW)^{1.0} \times (1 + \theta_{CL-CRRT})^{CRRT}$                                                                        | 1612.58 | +4.03        |
| Liver transplantation on CL             | Categorical       | $V_c = \theta_v \times (BW)^{1.0}$                                        | $CL = \theta_{CL} \times (BW)^{1.0} \times (1 + \theta_{CL-LT})^{LT}$                                                                            | 1588.54 | -20.01       |
| eGFR on Vc                              | Continuous        | $V_c = \theta_v \times (BW)^{1.0} \times (eGFR / 38.2)^{\theta_{V-eGFR}}$ | $CL = \theta_{CL} \times (BW)^{1.0}$                                                                                                             | 1561.46 | -47.09       |
| SIRS score on Vc                        | Categorical       | $V_c = \theta_v \times (BW)^{1.0} \times (1 + \theta_{V-SIRS})^{SIRS}$    | $CL = \theta_{CL} \times (BW)^{1.0}$                                                                                                             | 1533.22 | -75.33       |
| Daily urine excretion on Vc             | Continuous        | $V_c = \theta_v \times (BW)^{1.0} \times (UE/480)^{\theta_{V-UE}}$        | $CL = \theta_{CL} \times (BW)^{1.0}$                                                                                                             | 1613.71 | +5.16        |
| Daily ascites excretion on Vc           | Continuous        | $V_c = \theta_v \times (BW)^{1.0} \times (AE/105)^{\theta_{V-AE}}$        | $CL = \theta_{CL} \times (BW)^{1.0}$                                                                                                             | 1613.65 | +5.10        |
| CRRT on Vc                              | Categorical       | $V_c = \theta_v \times (BW)^{1.0} \times (1 + \theta_{V-CRRT})^{CRRT}$    | $CL = \theta_{CL} \times (BW)^{1.0}$                                                                                                             | 1583.59 | -24.96       |
| Liver transplantation on Vc             | Categorical       | $V_c = \theta_v \times (BW)^{1.0} \times (1 + \theta_{V-LT})^{LT}$        | $CL = \theta_{CL} \times (BW)^{1.0}$                                                                                                             | 1606.57 | -1.98        |
| <b>Multivariable Model</b>              |                   |                                                                           |                                                                                                                                                  |         |              |
| <b>Full model</b>                       |                   | $V_c = \theta_v \times (BW)^{1.0} \times (1 + \theta_{V-CRRT})^{CRRT}$    | $CL = \theta_{CL} \times (BW)^{1.0} \times (eGFR/38.2)^{\theta_{CL-eGFR}} \times (1 + \theta_{CL-SIRS})^{SIRS} \times (1 + \theta_{CL-LT})^{LT}$ | 1512.41 | -            |
| Final model (- LT on CL)                |                   | $V_c = \theta_v \times (BW)^{1.0} \times (1 + \theta_{V-CRRT})^{CRRT}$    | $CL = \theta_{CL} \times (BW)^{1.0} \times (eGFR/38.2)^{\theta_{CL-eGFR}} \times (1 + \theta_{CL-SIRS})^{SIRS}$                                  | 1514.70 | +2.29        |
| (- eGFR on CL)                          |                   | $V_c = \theta_v \times (BW)^{1.0} \times (1 + \theta_{V-CRRT})^{CRRT}$    | $CL = \theta_{CL} \times (BW)^{1.0} \times (1 + \theta_{CL-SIRS})^{SIRS}$                                                                        | 1545.02 | +32.61       |
| (- CRRT on Vc)                          |                   | $V_c = \theta_v \times (BW)^{1.0}$                                        | $CL = \theta_{CL} \times (BW)^{1.0} \times (eGFR/38.2)^{\theta_{CL-eGFR}} \times (1 + \theta_{CL-SIRS})^{SIRS}$                                  | 1538.01 | +25.6        |
| (- SIRS score on CL)                    |                   | $V_c = \theta_v \times (BW)^{1.0} \times (1 + \theta_{V-CRRT})^{CRRT}$    | $CL = \theta_{CL} \times (BW)^{1.0} \times (eGFR/38.2)^{\theta_{CL-eGFR}}$                                                                       | 1525.14 | +12.73       |

Vc, central volume of distribution; CL, clearance; OFV, objective function value;  $\Delta$ OFV, change in OFV from base model or full model; BW, body weight (kg); eGFR, estimated glomerular filtration rate (ml/min); SIRS, systemic inflammatory response syndrome; UE, daily urine excretion; AE, daily ascites excretion CRRT, continuous renal replacement therapy; LT, liver transplantation.

**TABLE S2** The probability of target attainment at levels of 40% and 100% time during unbound concentration exceeds the MIC in each of the four meropenem dosing regimens

| Target MIC | Infusion rate | $\%f_u T > \text{MIC}$ | SIRS status | CRRT status | SCr-based eGFR, ml/min |              |              |              |              |              |              |              |              |              |              |              |              |              |              |       |
|------------|---------------|------------------------|-------------|-------------|------------------------|--------------|--------------|--------------|--------------|--------------|--------------|--------------|--------------|--------------|--------------|--------------|--------------|--------------|--------------|-------|
|            |               |                        |             |             | 10                     |              |              |              | 25           |              |              |              | 50           |              |              |              | 100          |              |              |       |
|            |               |                        |             |             | 10 mg/kg q8h           | 20 mg/kg q8h | 40 mg/kg q8h | 80 mg/kg q8h | 10 mg/kg q8h | 20 mg/kg q8h | 40 mg/kg q8h | 80 mg/kg q8h | 10 mg/kg q8h | 20 mg/kg q8h | 40 mg/kg q8h | 80 mg/kg q8h | 10 mg/kg q8h | 20 mg/kg q8h | 40 mg/kg q8h |       |
| MIC = 1    | 0.5 h         | 40                     | -           | -           | 100.0                  | 100.0        | 100.0        | 100.0        | 100.0        | 100.0        | 100.0        | 100.0        | 100.0        | 100.0        | 100.0        | 100.0        | 100.0        | 100.0        | 100.0        |       |
|            |               |                        | -           | +           | 100.0                  | 100.0        | 100.0        | 100.0        | 100.0        | 100.0        | 100.0        | 100.0        | 100.0        | 100.0        | 100.0        | 100.0        | 100.0        | 100.0        | 100.0        | 100.0 |
|            |               |                        | +           | -           | 100.0                  | 100.0        | 100.0        | 100.0        | 100.0        | 100.0        | 100.0        | 100.0        | 100.0        | 100.0        | 100.0        | 100.0        | 100.0        | 82.6         | 100.0        | 100.0 |
|            |               | +                      | +           | 100.0       | 100.0                  | 100.0        | 100.0        | 100.0        | 100.0        | 100.0        | 100.0        | 100.0        | 100.0        | 100.0        | 100.0        | 100.0        | 100.0        | 100.0        | 100.0        | 100.0 |
|            |               | 100                    | -           | -           | 68.3                   | 100.0        | 100.0        | 100.0        | 14.4         | 69.9         | 100.0        | 100.0        | 2.0          | 27.3         | 80.0         | 100.0        | 0.2          | 7.3          | 44.5         |       |
|            |               |                        | -           | +           | 100.0                  | 100.0        | 100.0        | 100.0        | 79.7         | 100.0        | 100.0        | 100.0        | 34.1         | 97.2         | 100.0        | 100.0        | 9.4          | 61.5         | 100.0        |       |
|            | +             |                        | -           | 22.7        | 81.0                   | 100.0        | 100.0        | 2.0          | 24.1         | 77.7         | 100.0        | 0.0          | 4.0          | 35.2         | 85.1         | 0.0          | 0.7          | 11.3         |              |       |
|            | +             | +                      | 89.9        | 100.0       | 100.0                  | 100.0        | 31.0         | 94.4         | 100.0        | 100.0        | 6.2          | 49.8         | 100.0        | 100.0        | 0.7          | 18.6         | 70.4         |              |              |       |
|            | 3 h           | 40                     | -           | -           | 100.0                  | 100.0        | 100.0        | 100.0        | 100.0        | 100.0        | 100.0        | 100.0        | 100.0        | 100.0        | 100.0        | 100.0        | 100.0        | 100.0        | 100.0        |       |
|            |               |                        | -           | +           | 100.0                  | 100.0        | 100.0        | 100.0        | 100.0        | 100.0        | 100.0        | 100.0        | 100.0        | 100.0        | 100.0        | 100.0        | 100.0        | 100.0        | 100.0        |       |
|            |               |                        | +           | -           | 100.0                  | 100.0        | 100.0        | 100.0        | 100.0        | 100.0        | 100.0        | 100.0        | 100.0        | 100.0        | 100.0        | 100.0        | 100.0        | 100.0        | 100.0        | 100.0 |
|            |               | +                      | +           | 100.0       | 100.0                  | 100.0        | 100.0        | 100.0        | 100.0        | 100.0        | 100.0        | 100.0        | 100.0        | 100.0        | 100.0        | 100.0        | 100.0        | 100.0        | 100.0        | 100.0 |
| 100        |               | -                      | -           | 94.8        | 100.0                  | 100.0        | 100.0        | 37.8         | 96.7         | 100.0        | 100.0        | 8.4          | 54.1         | 100.0        | 100.0        | 1.3          | 21.2         | 74.3         |              |       |
|            |               | -                      | +           | 100.0       | 100.0                  | 100.0        | 100.0        | 100.0        | 100.0        | 100.0        | 100.0        | 66.0         | 100.0        | 100.0        | 100.0        | 27.3         | 92.9         | 100.0        |              |       |
|            | +             | -                      | 49.6        | 100.0       | 100.0                  | 100.0        | 7.2          | 52.0         | 100.0        | 100.0        | 0.6          | 14.8         | 63.5         | 100.0        | 0.0          | 2.8          | 28.9         |              |              |       |
| +          | +             | 100.0                  | 100.0       | 100.0       | 100.0                  | 61.3         | 100.0        | 100.0        | 100.0        | 20.6         | 85.2         | 100.0        | 100.0        | 4.0          | 45.5         | 99.6         |              |              |              |       |
| MIC = 2    | 0.5 h         | 40                     | -           | -           | 100.0                  | 100.0        | 100.0        | 100.0        | 100.0        | 100.0        | 100.0        | 100.0        | 100.0        | 100.0        | 100.0        | 47.3         | 100.0        | 100.0        |              |       |
|            |               |                        | -           | +           | 100.0                  | 100.0        | 100.0        | 100.0        | 100.0        | 100.0        | 100.0        | 100.0        | 100.0        | 100.0        | 100.0        | 95.7         | 100.0        | 100.0        |              |       |
|            |               |                        | +           | -           | 100.0                  | 100.0        | 100.0        | 100.0        | 61.6         | 100.0        | 100.0        | 100.0        | 11.9         | 86.5         | 100.0        | 100.0        | 2.2          | 47.3         | 100.0        |       |
|            |               | +                      | +           | 100.0       | 100.0                  | 100.0        | 100.0        | 100.0        | 100.0        | 100.0        | 100.0        | 52.8         | 100.0        | 100.0        | 100.0        | 18.5         | 100.0        | 100.0        |              |       |
|            |               | 100                    | -           | -           | 10.6                   | 67.4         | 100.0        | 100.0        | 1.1          | 25.6         | 84.5         | 100.0        | 0.0          | 2.3          | 26.7         | 79.8         | 0.0          | 0.2          | 7.3          |       |
|            |               |                        | -           | +           | 60.1                   | 100.0        | 100.0        | 100.0        | 19.5         | 92.8         | 100.0        | 100.0        | 1.4          | 33.1         | 97.1         | 100.0        | 0.1          | 9.4          | 62.2         |       |
|            | +             |                        | -           | 0.3         | 14.9                   | 100.0        | 100.0        | 0.0          | 1.3          | 31.5         | 100.0        | 0.0          | 0.0          | 1.7          | 32.9         | 0.0          | 0.0          | 0.1          |              |       |
|            | +             | +                      | 3.8         | 55.4        | 100.0                  | 100.0        | 0.3          | 16.6         | 77.3         | 100.0        | 0.0          | 0.9          | 20.0         | 71.9         | 0.0          | 0.0          | 4.5          |              |              |       |
|            | 3 h           | 40                     | -           | -           | 100.0                  | 100.0        | 100.0        | 100.0        | 100.0        | 100.0        | 100.0        | 100.0        | 100.0        | 100.0        | 100.0        | 100.0        | 100.0        | 100.0        | 100.0        |       |
|            |               |                        | -           | +           | 100.0                  | 100.0        | 100.0        | 100.0        | 100.0        | 100.0        | 100.0        | 100.0        | 100.0        | 100.0        | 100.0        | 100.0        | 100.0        | 100.0        | 100.0        |       |
|            |               |                        | +           | -           | 100.0                  | 100.0        | 100.0        | 100.0        | 100.0        | 100.0        | 100.0        | 100.0        | 98.6         | 100.0        | 100.0        | 100.0        | 62.4         | 100.0        | 100.0        |       |

|         |       |     |      |       |       |       |       |       |       |       |       |       |       |       |       |       |       |       |       |
|---------|-------|-----|------|-------|-------|-------|-------|-------|-------|-------|-------|-------|-------|-------|-------|-------|-------|-------|-------|
| MIC = 4 | 100   | +   | +    | 100.0 | 100.0 | 100.0 | 100.0 | 100.0 | 100.0 | 100.0 | 100.0 | 100.0 | 100.0 | 100.0 | 59.1  | 100.0 | 100.0 |       |       |
|         |       | -   | -    | 26.0  | 95.3  | 100.0 | 100.0 | 4.7   | 52.8  | 100.0 | 100.0 | 0.1   | 8.6   | 55.3  | 100.0 | 0.0   | 1.0   | 21.2  |       |
|         |       | -   | +    | 86.7  | 100.0 | 100.0 | 100.0 | 41.9  | 100.0 | 100.0 | 100.0 | 5.1   | 65.4  | 100.0 | 100.0 | 0.7   | 27.1  | 93.8  |       |
|         |       | +   | -    | 1.3   | 47.1  | 100.0 | 100.0 | 0.0   | 6.2   | 81.5  | 100.0 | 0.0   | 1.5   | 9.5   | 77.2  | 0.0   | 0.0   | 1.0   |       |
|         | +     | +   | 12.5 | 86.1  | 100.0 | 100.0 | 1.5   | 39.9  | 100.0 | 100.0 | 0.0   | 4.9   | 47.5  | 100.0 | 0.0   | 0.6   | 17.1  |       |       |
|         | 0.5 h | 40  | -    | -     | 81.8  | 100.0 | 100.0 | 100.0 | 24.4  | 100.0 | 100.0 | 100.0 | 3.4   | 84.3  | 100.0 | 100.0 | 0.3   | 46.5  | 100.0 |
|         |       |     | -    | +     | 99.6  | 100.0 | 100.0 | 100.0 | 43.7  | 100.0 | 100.0 | 100.0 | 9.4   | 100.0 | 100.0 | 100.0 | 1.4   | 95.6  | 100.0 |
|         |       | +   | -    | 32.7  | 100.0 | 100.0 | 100.0 | 2.9   | 84.6  | 100.0 | 100.0 | 0.2   | 36.6  | 100.0 | 100.0 | 0.0   | 10.5  | 81.8  |       |
|         |       | +   | +    | 54.1  | 100.0 | 100.0 | 100.0 | 8.8   | 100.0 | 100.0 | 100.0 | 0.9   | 89.4  | 100.0 | 100.0 | 0.0   | 49.2  | 100.0 |       |
|         |       | 100 | -    | -     | 0.1   | 9.8   | 67.4  | 100.0 | 0.0   | 0.5   | 15.9  | 70.5  | 0.0   | 0.0   | 2.1   | 26.5  | 0.0   | 0.0   | 0.4   |
|         |       |     | -    | +     | 2.2   | 60.3  | 100.0 | 100.0 | 0.0   | 11.4  | 80.2  | 100.0 | 0.0   | 1.1   | 34.3  | 96.2  | 0.0   | 0.0   | 9.3   |
|         |       |     | +    | -     | 0.0   | 1.0   | 21.8  | 80.7  | 0.0   | 0.0   | 2.1   | 24.8  | 0.0   | 0.0   | 0.1   | 4.3   | 0.0   | 0.0   | 0.0   |
|         |       |     | +    | +     | 0.1   | 17.0  | 90.0  | 100.0 | 0.0   | 1.0   | 32.8  | 95.0  | 0.0   | 0.0   | 6.4   | 50.9  | 0.0   | 0.0   | 0.7   |
|         | 3 h   | 40  | -    | -     | 100.0 | 100.0 | 100.0 | 100.0 | 64.2  | 100.0 | 100.0 | 100.0 | 20.0  | 100.0 | 100.0 | 100.0 | 3.5   | 100.0 | 100.0 |
|         |       |     | -    | +     | 100.0 | 100.0 | 100.0 | 100.0 | 53.5  | 100.0 | 100.0 | 100.0 | 14.3  | 100.0 | 100.0 | 100.0 | 2.8   | 100.0 | 100.0 |
|         |       |     | +    | -     | 76.0  | 100.0 | 100.0 | 100.0 | 19.3  | 100.0 | 100.0 | 100.0 | 2.3   | 100.0 | 100.0 | 100.0 | 0.1   | 95.0  | 100.0 |
| +       |       |     | +    | 64.6  | 100.0 | 100.0 | 100.0 | 13.7  | 100.0 | 100.0 | 100.0 | 1.4   | 100.0 | 100.0 | 100.0 | 0.1   | 94.1  | 100.0 |       |
| 100     |       | -   | -    | 0.5   | 26.2  | 96.2  | 100.0 | 0.0   | 2.1   | 39.0  | 98.0  | 0.0   | 0.1   | 8.5   | 55.3  | 0.0   | 0.0   | 1.4   |       |
|         |       | -   | +    | 6.5   | 87.6  | 100.0 | 100.0 | 0.1   | 29.3  | 100.0 | 100.0 | 0.0   | 5.4   | 63.8  | 100.0 | 0.0   | 0.6   | 26.7  |       |
|         |       | +   | -    | 0.0   | 4.1   | 48.9  | 100.0 | 0.0   | 0.1   | 7.9   | 53.3  | 0.0   | 0.0   | 0.6   | 14.7  | 0.0   | 0.0   | 0.0   |       |
|         |       | +   | +    | 0.4   | 38.9  | 100.0 | 100.0 | 0.0   | 4.4   | 63.2  | 100.0 | 0.0   | 0.2   | 20.6  | 84.3  | 0.0   | 0.0   | 4.0   |       |
| MIC = 8 | 0.5 h | -   | -    | 0.4   | 82.2  | 100.0 | 100.0 | 0.0   | 23.7  | 100.0 | 100.0 | 0.0   | 3.6   | 85.8  | 100.0 | 0.0   | 0.4   | 47.6  |       |
|         |       | -   | +    | 0.5   | 100.0 | 100.0 | 100.0 | 0.0   | 41.0  | 100.0 | 100.0 | 0.0   | 9.7   | 100.0 | 100.0 | 0.0   | 1.7   | 96.3  |       |
|         |       | +   | -    | 0.0   | 34.5  | 100.0 | 100.0 | 0.0   | 3.4   | 82.8  | 100.0 | 0.0   | 0.3   | 36.2  | 100.0 | 0.0   | 0.0   | 10.8  |       |
|         |       | +   | +    | 0.0   | 56.6  | 100.0 | 100.0 | 0.0   | 8.3   | 100.0 | 100.0 | 0.0   | 0.8   | 87.5  | 100.0 | 0.0   | 0.0   | 49.4  |       |
|         | 100   | -   | -    | 0.0   | 0.1   | 11.3  | 68.0  | 0.0   | 0.0   | 0.4   | 16.1  | 0.0   | 0.0   | 1.1   | 34.8  | 0.0   | 0.0   | 0.0   |       |
|         |       | -   | +    | 0.0   | 2.3   | 62.9  | 100.0 | 0.0   | 0.0   | 11.2  | 80.1  | 0.0   | 0.0   | 0.0   | 0.1   | 0.0   | 0.0   | 0.1   |       |
|         |       | +   | -    | 0.0   | 0.0   | 1.0   | 23.5  | 0.0   | 0.0   | 0.0   | 1.8   | 0.0   | 0.0   | 0.0   | 2.3   | 0.0   | 0.0   | 0.0   |       |
|         |       | +   | +    | 0.0   | 0.1   | 18.9  | 91.2  | 0.0   | 0.0   | 1.2   | 31.9  | 0.0   | 0.0   | 0.0   | 6.0   | 0.0   | 0.0   | 0.0   |       |
|         | 3 h   | 40  | -    | -     | 0.9   | 100.0 | 100.0 | 100.0 | 0.0   | 62.4  | 100.0 | 100.0 | 0.0   | 19.7  | 100.0 | 100.0 | 0.0   | 4.6   | 100.0 |
|         |       |     | -    | +     | 0.4   | 100.0 | 100.0 | 100.0 | 0.0   | 51.5  | 100.0 | 100.0 | 0.0   | 13.9  | 100.0 | 100.0 | 0.0   | 2.7   | 100.0 |
|         |       |     | +    | -     | 0.0   | 75.9  | 100.0 | 100.0 | 0.0   | 18.6  | 100.0 | 100.0 | 0.0   | 2.7   | 100.0 | 100.0 | 0.0   | 0.2   | 96.0  |
|         |       |     | +    | +     | 0.0   | 66.8  | 100.0 | 100.0 | 0.0   | 12.1  | 100.0 | 100.0 | 0.0   | 1.4   | 100.0 | 100.0 | 0.0   | 0.1   | 94.8  |
| 100     |       | -   | -    | 0.0   | 0.3   | 27.6  | 96.9  | 0.0   | 0.0   | 2.1   | 38.5  | 0.0   | 0.0   | 0.1   | 8.3   | 0.0   | 0.0   | 0.0   |       |
|         |       | -   | +    | 0.0   | 7.2   | 89.5  | 100.0 | 0.0   | 0.2   | 28.2  | 100.0 | 0.0   | 0.0   | 5.0   | 64.8  | 0.0   | 0.0   | 0.7   |       |

|   |   |     |     |      |       |     |     |     |      |     |     |     |      |     |     |     |
|---|---|-----|-----|------|-------|-----|-----|-----|------|-----|-----|-----|------|-----|-----|-----|
| + | - | 0.0 | 0.0 | 4.5  | 50.7  | 0.0 | 0.0 | 0.1 | 7.0  | 0.0 | 0.0 | 0.0 | 0.7  | 0.0 | 0.0 | 0.0 |
| + | + | 0.0 | 0.4 | 40.7 | 100.0 | 0.0 | 0.0 | 4.3 | 62.3 | 0.0 | 0.0 | 0.3 | 19.7 | 0.0 | 0.0 | 0.0 |

SCr, serum creatinine; eGFR, estimated glomerular filtration rate; SIRS, systemic inflammatory response syndrome; CRRT, continuous renal

replacement therapy. Shaded blocks indicate probability target attainment >90%.
